# Supplementary material for: Improvement of Attention, Executive Functions, and Processing Speed in Elderly Women as a Result of Involvement in the Nordic Walking Training Program and Vitamin D Supplementation
Source: PubMed Central journal article supplement (PMC6628124; doi:10.3390/nu11061311), 2019-06-11
Supplement: nutrients-11-01311-s001.pdf [file nutrients-11-01311-s001.pdf]

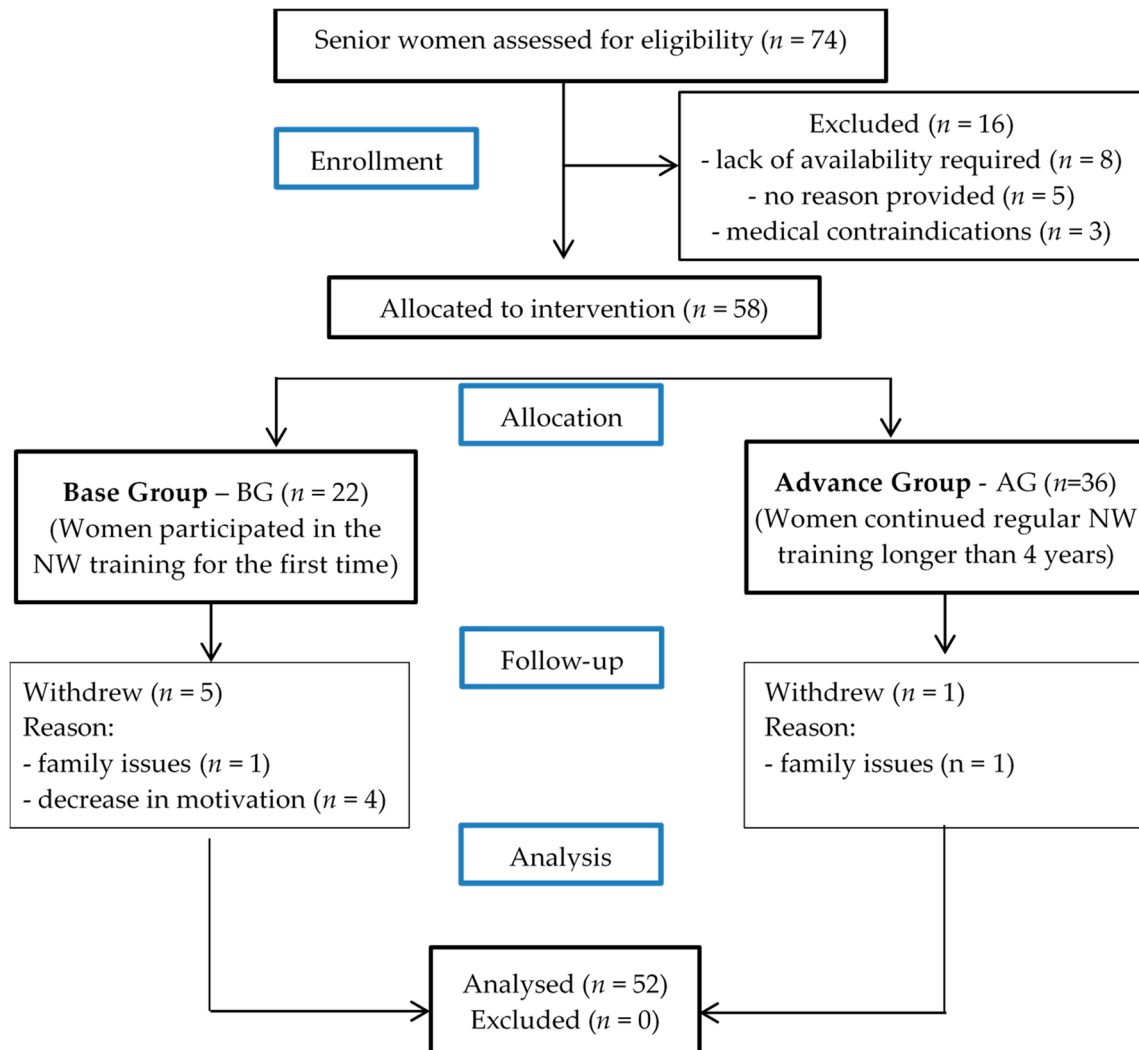

**Figure S1.** Study flow diagram of the progress through the phases of experiment.
